# Supplementary material
Source: MDPI journal article supplement (https://www.mdpi.com/2072-4292/14/9/1957)
Supplement: s1 [file s1]

## Near-surface and high resolution satellite time series for detecting crop phenology

Chunyuan Diao, Geyang Li

### Supplementary Material

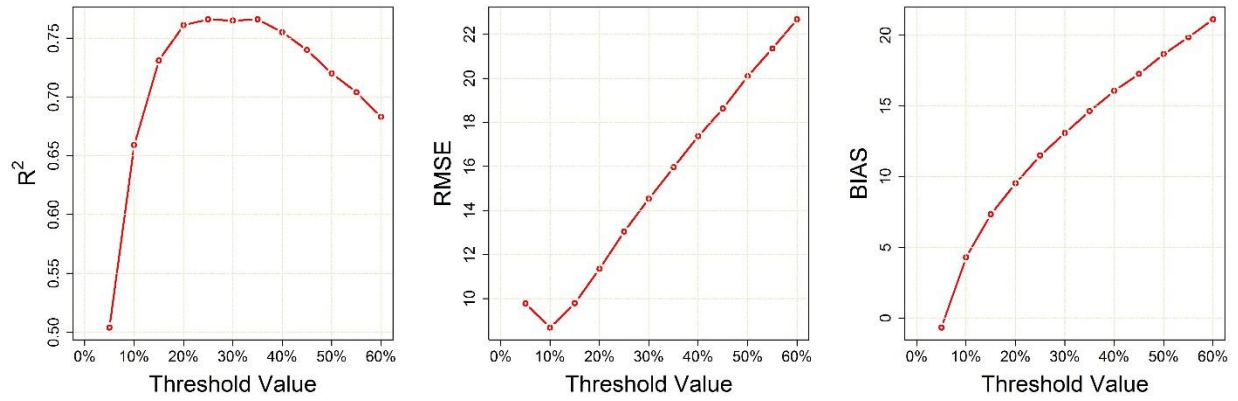

Figure S1. The accuracy statistics of comparisons between the PhenoCam GCC-based TRS-SOS and the visually-observed emergence under different thresholds for the shared corn and soybean sites.

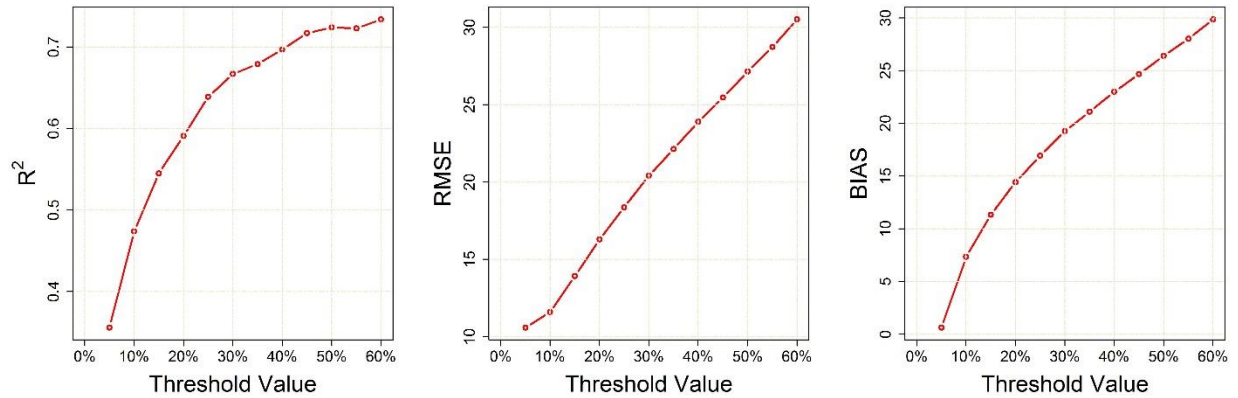

Figure S2. The accuracy statistics of comparisons between the PlanetScope NDVI-based TRS-SOS and the visually-observed emergence under different thresholds for the shared corn and soybean sites.
